# Supplementary material for: Long-term hematopoietic stem cells as a parasite niche during treatment failure in visceral leishmaniasis
Source: PubMed Central journal article supplement (PMC9233693; doi:10.1038/s42003-022-03591-7), 2022-06-25
Supplement: 42003_2022_3591_MOESM1_ESM.pdf [file 42003_2022_3591_MOESM1_ESM.pdf]

# Long-term hematopoietic stem cells as a parasite niche during treatment failure in visceral leishmaniasis

Laura Dirckx<sup>1</sup>, Sarah Hendrickx<sup>1</sup>, Margot Merlot<sup>1</sup>, Dimitri Bulté<sup>1</sup>, Marick Starick<sup>2,3</sup>, Jessy Elst<sup>4</sup>, André Bafica<sup>3</sup>, Didier G. Ebo<sup>4</sup>, Louis Maes<sup>1</sup>, Johan Van Weyenbergh<sup>2</sup>, Guy Caljon<sup>1\*</sup>

<sup>1</sup>Laboratory of Microbiology, Parasitology and Hygiene (LMPH), Infla-Med Centre of Excellence, University of Antwerp, Antwerp, Belgium.

<sup>2</sup>Clinical and Epidemiological Virology, Department of Microbiology, Immunology and Transplantation, Rega Institute of Medical Research, KU Leuven, Leuven, Belgium.

<sup>3</sup>Laboratory of Immunobiology, Department of Microbiology, Immunology and Parasitology Federal University of Santa Catarina, Florianopolis, Brazil.

<sup>4</sup>Department of Immunology – Allergology – Rheumatology, Faculty of Medicine and Health Science and the Infla-Med Centre of Excellence, University of Antwerp, Antwerp University Hospital, Antwerp, Belgium.

## Supplementary information

**Supplementary Data 1:** List of compounds and their dose tested in Syrian golden hamsters. Percentage of recovery (%R), single injection dose (SID), twice daily injection dose (BID).

**Supplementary Data 2:** Differential LT-HSC genes and systems biology analyses to evaluate enrichment of hallmark gene sets, pathways, transcription factor motifs, cell type enrichment and cross-pathology overlap.

**Supplementary Data 3:** The source data of Figures 1-6 and Supplementary Figures 1-6.

## Supplementary figures

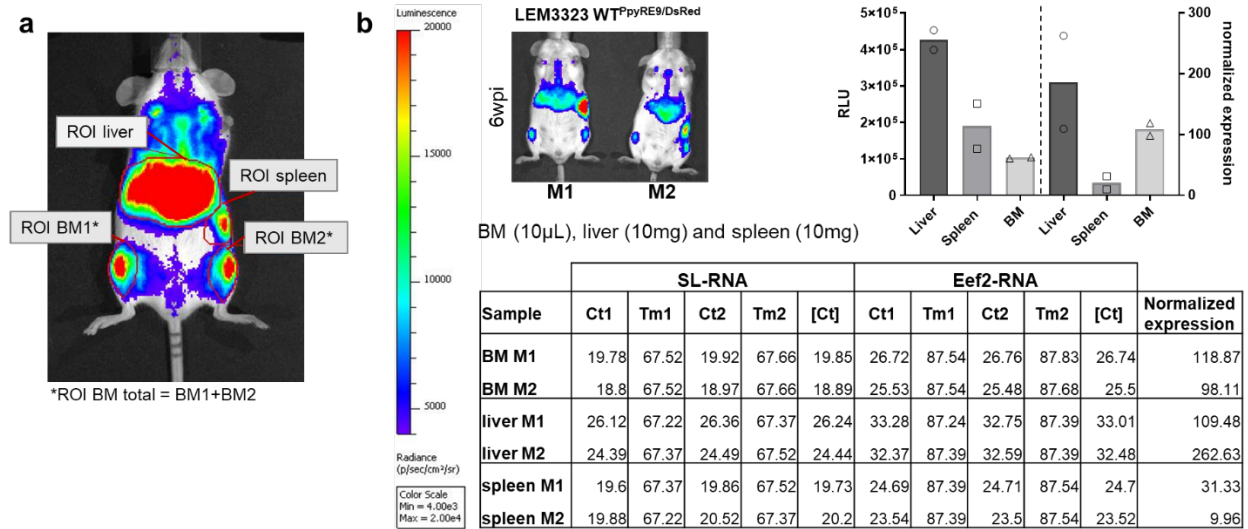

**Supplementary Figure 1. (a)** regions of interest (ROI) to calculate relative luminescence units. **(b)** Quantitative analysis of BLI imaging using RT-qPCR shows an underestimation of BM infection. Representative example of mice infected for 6 weeks (6wpi) with LEM3323 WT<sup>PpyRE9/DsRed</sup> imaged with BLI and subsequently sacrificed to perform RT-qPCR on the liver, spleen and BM. Normalized expression based on SL-RNA, which represents the parasite RNA, and Eef2 as the control for mouse RNA. Results are based on two independent repeats, 2 BALB/c mice per group.

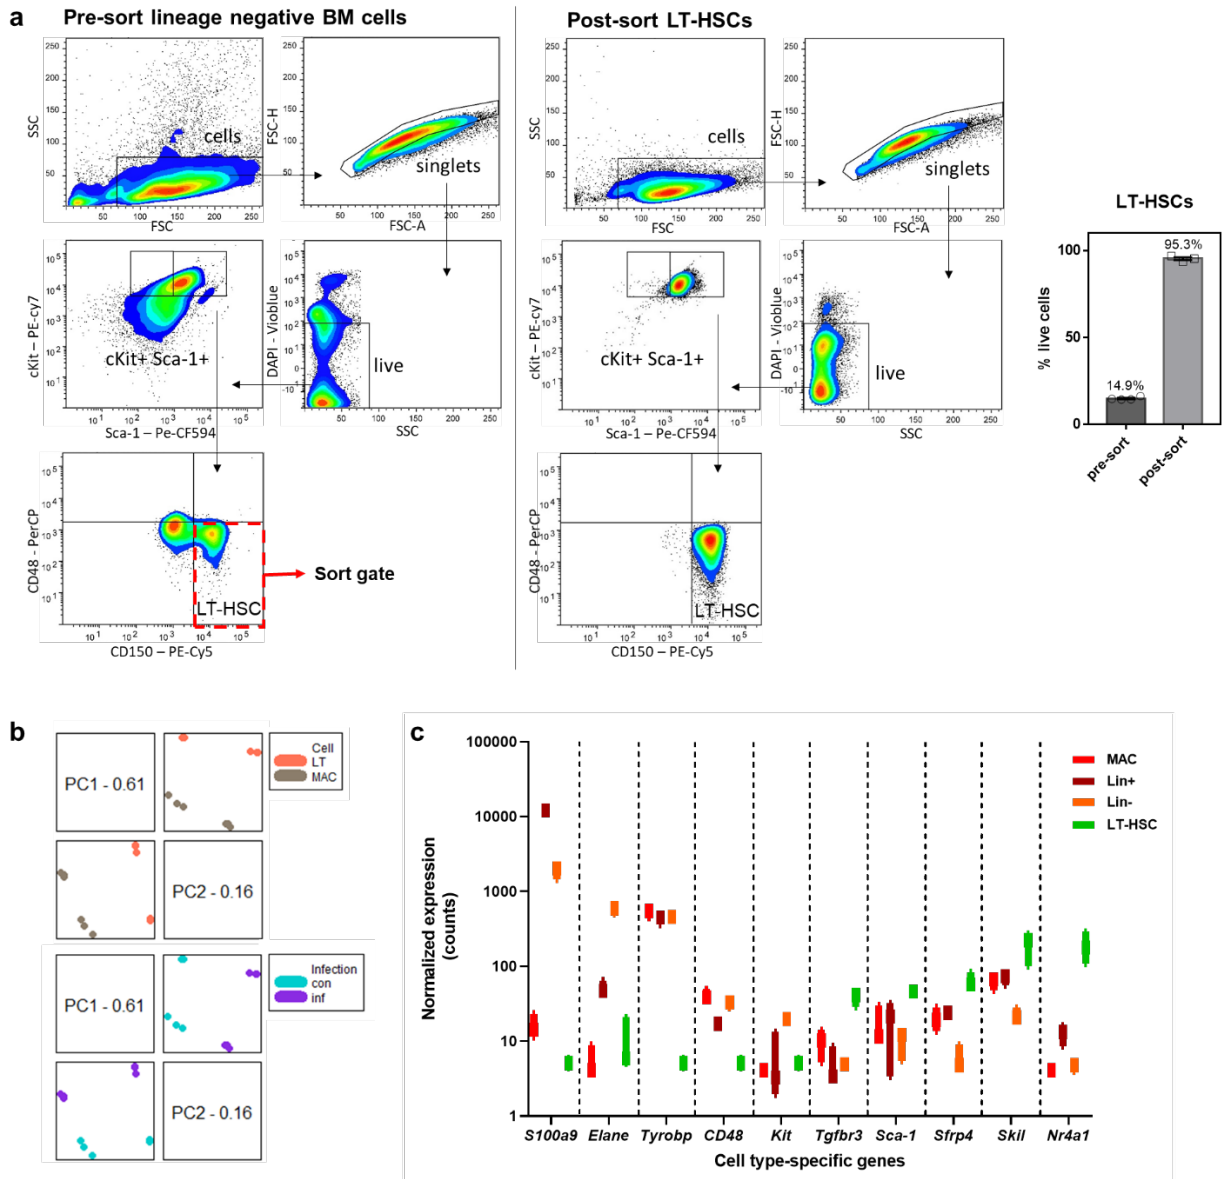

**Supplementary Figure 2. Purity assessment of post-sort LT-HSC.** (a) Lineage depleted BM of naive BALB/c mice was sorted for LT-HSC and re-measured to assess the purity of sorting with FACSMelody. (b) PCA analysis of the nCounter digital transcriptomics data revealing distant clustering of the LT-HSC and macrophage samples, confirming purity of the sorted samples. (c) Quantification of post-sorting purity using cell type-specific transcripts for Lin-, MAC, Lin+ and LT-HSC, including established (*S100a9*, *Elane*, *CD48*, *Kit*) and markers identified by nCounter analysis (*Tyrobp*, *Tgfb3*, *Sfrp4*, *Skil*, *Nr4a1*). Based on the 7 most significant transcripts, the maximum contamination of purified LT-HSC with MAC, Lin+ or Lin- cells was 0.0009%, 0.001% and 0.8%, respectively.

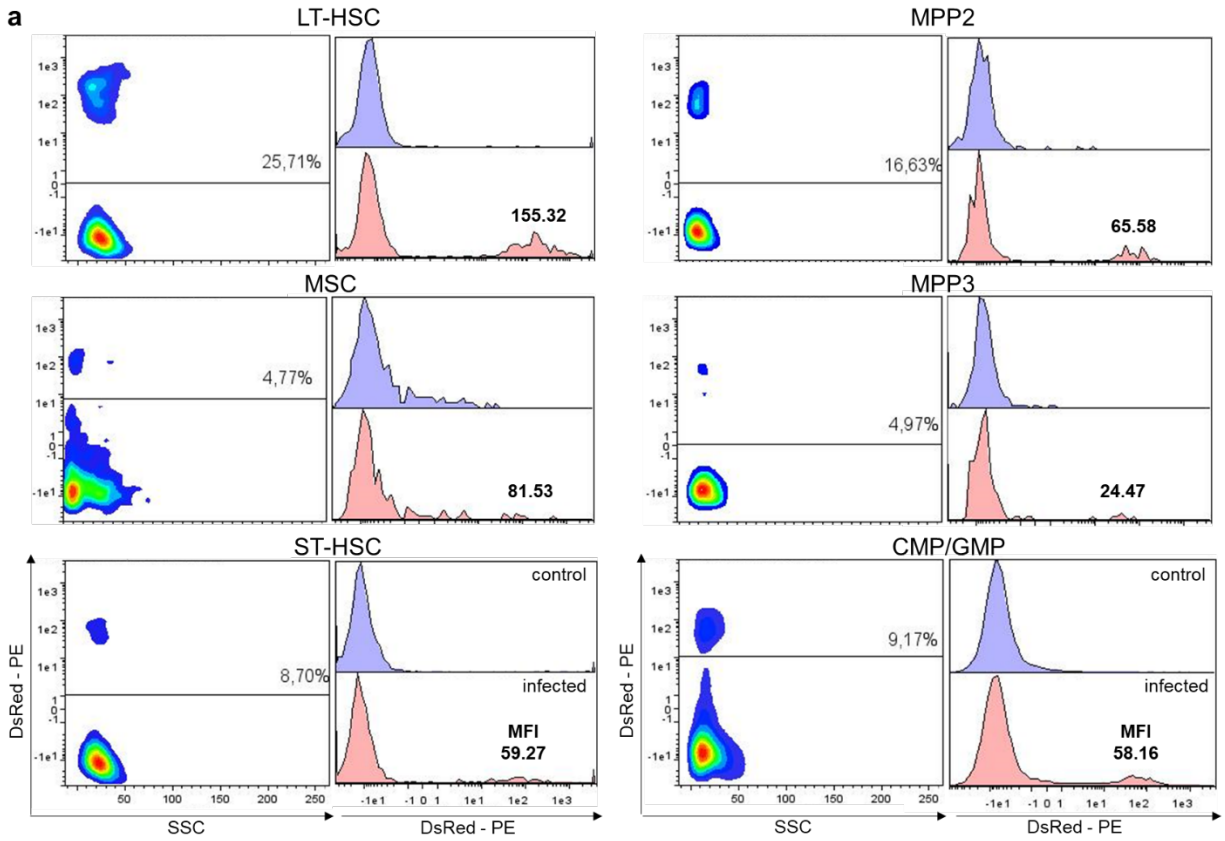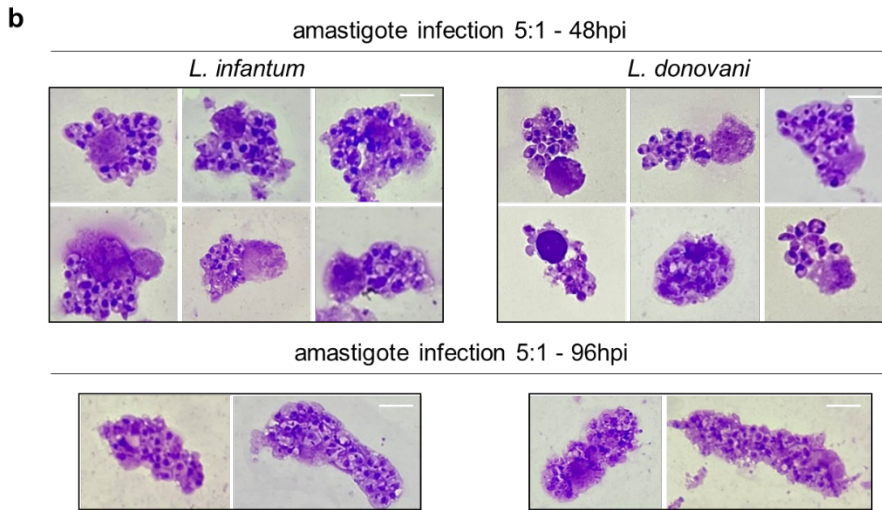

**Supplementary Figure 3. (a)** DsRed plots of all lineage negative BM subsets and histogram of representative result for Figure 3. Percentage of infection and MFI is provided on plots. Median fluorescence intensity (MFI). **(b)** Confirmation of amastigote infection of LT-HSC, both 48 and 96 hpi, using both *L. infantum* (LEM3323 WT<sup>PpyRE9/DsRed</sup>) and *L. donovani* (Ldl82 WT<sup>PpyRE9/DsRed</sup>) amastigotes purified from peritoneal macrophages 96 hpi. Scale bar = 10  $\mu$ m.

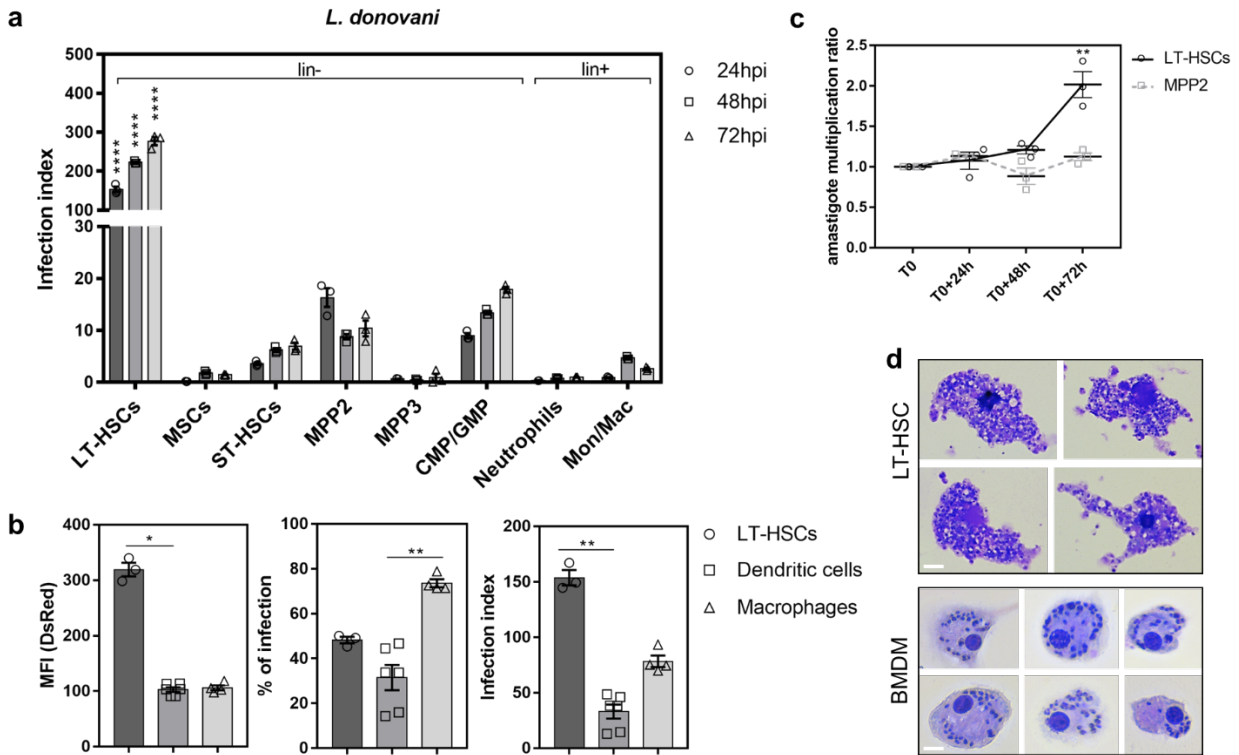

**Supplementary Figure 4. LT-HSC are most susceptible to VL infection *ex vivo*.** (a) *Ex vivo* Ldl82 WT<sup>PpyRE9/DsRed</sup> infection of lineage depleted BM collected from BALB/c mice: infection index representing DsRed MFI × % of infection. Statistical comparisons were made between LT-HSC and all other groups, for each time point. (b) Evolution over time of the intracellular parasite burden (amastigote multiplication ratio) in two BM cell subsets: LT-HSC and MPP2s. (c) Comparison of MFI, % infection and infection index between BM-derived dendritic cells and macrophages and LT-HSC. (d) Giemsa staining of Lld82 WT<sup>PpyRE9/DsRed</sup> infected BM-derived macrophages and sorted LT-HSC 120 hpi. Scale bar = 10 μm. (a-d) Days post-infection (dpi), median fluorescence intensity (MFI), mesenchymal stem cell (MSC), long-term hematopoietic stem cell (LT-HSC), short-term hematopoietic stem cell (ST-HSC), multipotent progenitor (MPP), common myeloid progenitor (CMP), granulocyte-monocyte progenitor (GMP), monocyte/macrophage (Mon/Mac). Results are shown as mean ± SEM and are based on at least three independent repeats (3 ≤ n ≤ 6). Statistical significance was found with two-tailed tests, *i.e.* 2-way ANOVA in (a), Kruskal-Wallis in (b), and multiple t test in (d). \*p < 0.05, \*\*p < 0.01, \*\*\*\*p < 0.0001.

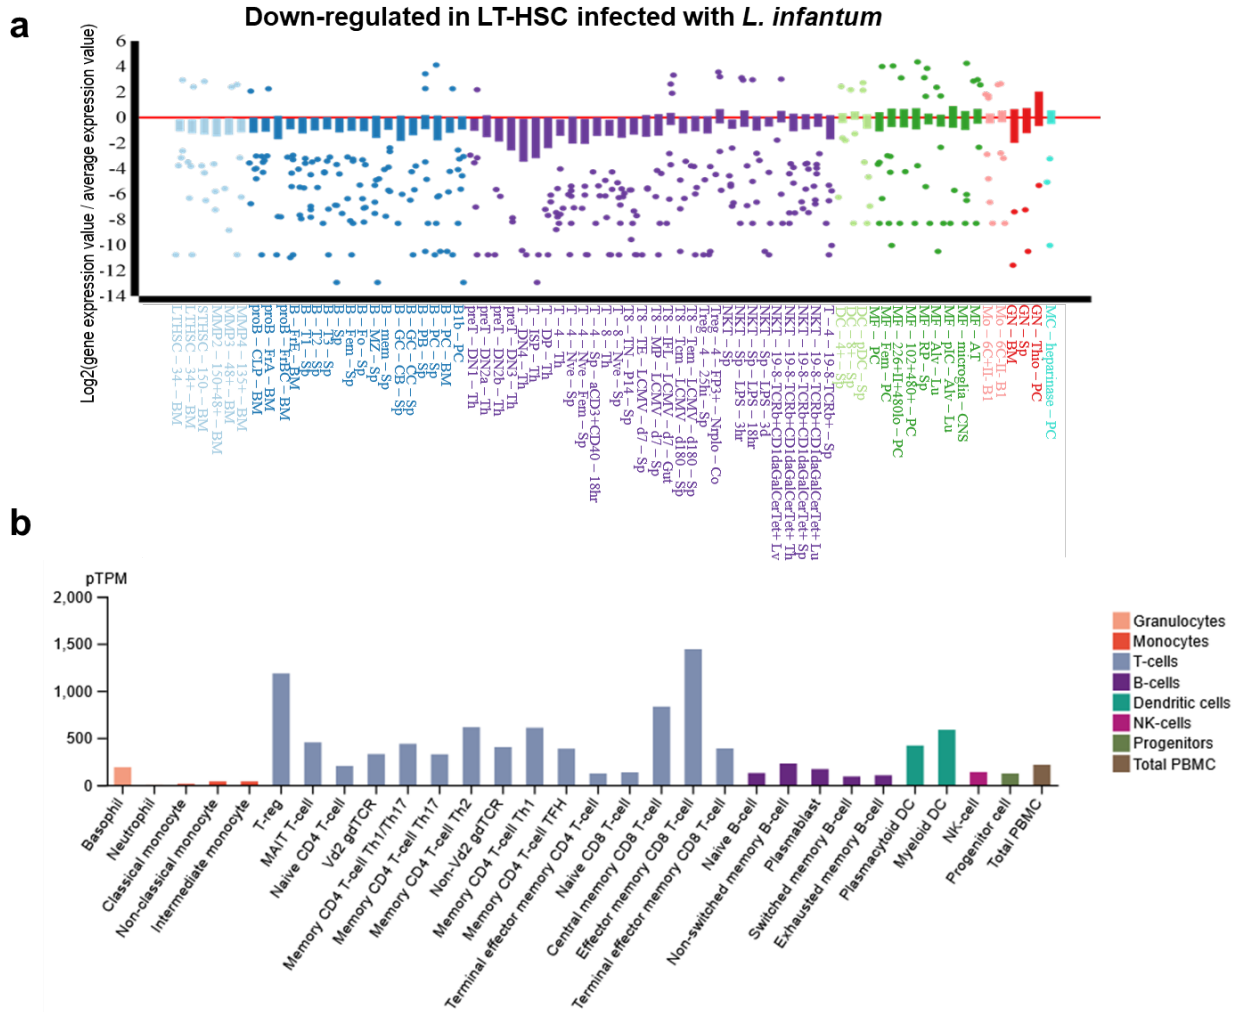

**Supplementary Figure 5. Systems biology analysis of DEG in LT-HSC. (a)** Genes down-regulated in LT-HSC upon infection with *L. infantum* are not significantly over- or under-expressed in any current known murine leukocyte subset in the exhaustive ImmGen database. **(b)** *Rgs1* mRNA is detectable in purified human progenitor (CD34+) and total PBMCs, and highly expressed in specific mature leukocyte subsets (Tregs, several CD4 memory subsets, CD8 central/effector memory cells, plasmacytoid and myeloid DCs).

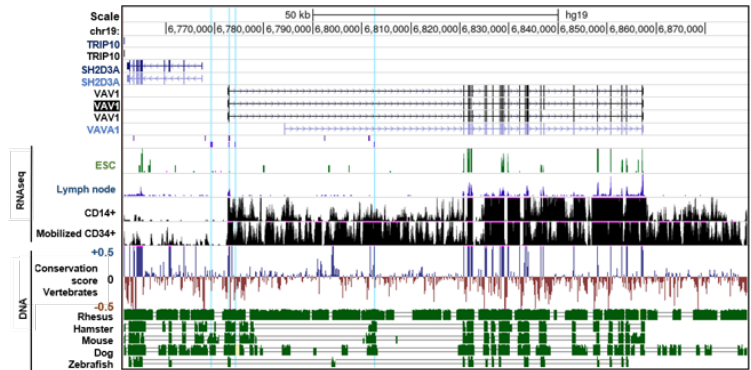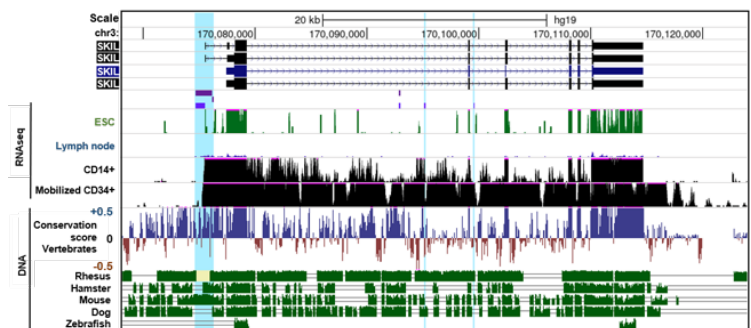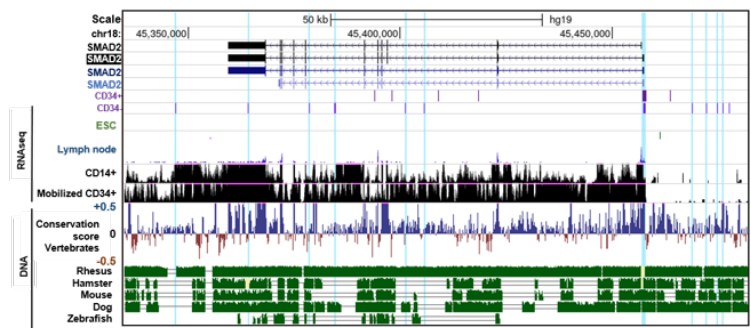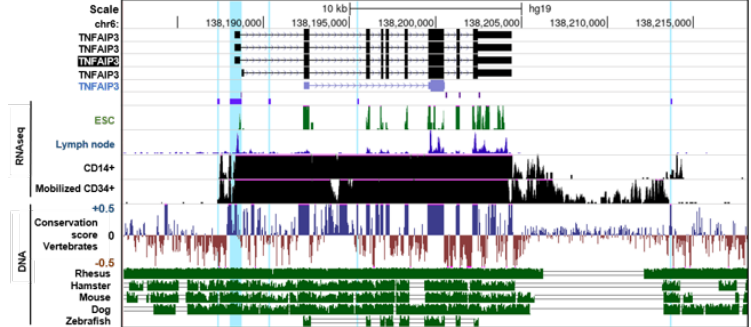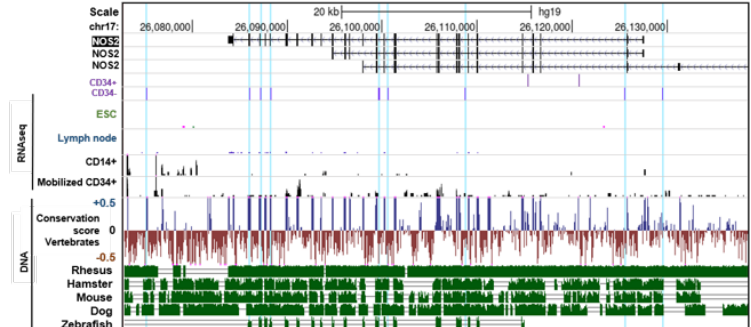

**Supplementary Figure 6. StemLeish gene epigenomic/transcriptional regulation and genomic conservation.**

Integrated epigenetic, transcriptomic and genomic analysis of the *Vav1*, *Skil*, *Smad2*, *Tnfaip3* and *Nos2* loci, visualized in UCSC Gene browser. Open chromatin regions (DNase I Hypersensitive Sites) in purified CD34+ HSC (indicated as CD34+) and HSC undergoing myeloid differentiation (indicated as CD34-) are indicated by light blue shades. Transcriptomic data (RNAseq) represent mapped reads present in purified CD14+ vs. purified mobilized CD34+ cells, with embryonic stem cells (ESC) and lymph node RNAseq data plotted for comparison. Genomic conservation score across 100 different vertebrate species (blue: conserved, brown: not conserved), with leishmaniasis model species (rhesus macaques, mouse, hamster, dog) plotted individually (green panels below), as compared to the human reference genome.



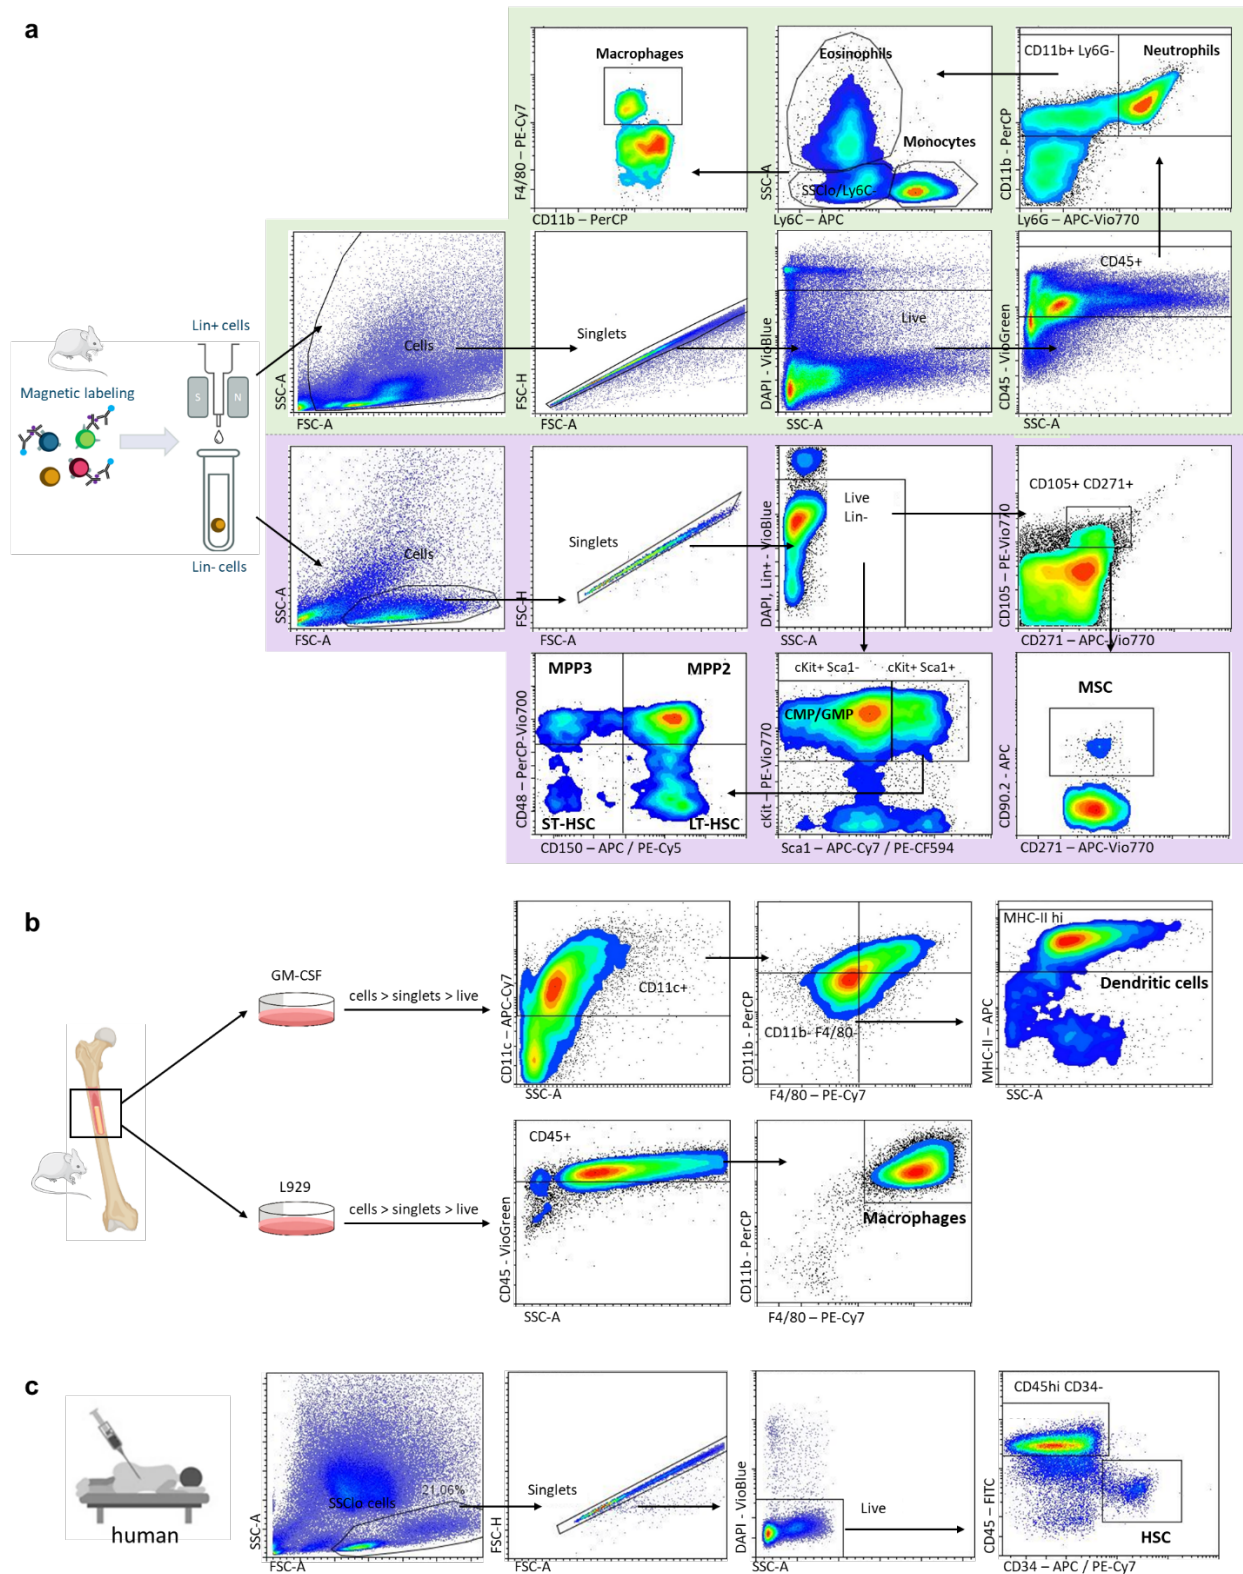

**Supplementary Figure 7. Flow cytometry gating strategy. (a)** BM cells were separated into lineage positive (Lin+) and negative (Lin-) cells using negative magnetic sorting. For both fractions, a cell gate was selected in a SSC-A versus FSC-A plot, followed by a gating on singlets in a FSC-H versus FSC-A plot. Lin+ live (DAPI-) CD45+ cells were further

characterized as neutrophils (CD11b<sup>+</sup> Ly-6G<sup>+</sup>), monocytes (Ly-6Chi) and macrophages (SSC<sup>lo</sup>, Ly-6C<sup>-</sup>, F4/80<sup>+</sup>). Live (DAPI<sup>-</sup>) cells were either plotted as cKit versus Sca1 or as CD105 versus CD271 to allow identification of hematopoietic stem cells or mesenchymal stem cells, respectively. cKit+Sca1<sup>+</sup> cells were further characterized as LT-HSC (CD48<sup>-</sup> CD150<sup>+</sup>), ST-HSCs (CD48<sup>-</sup> CD150<sup>-</sup>), MPP2 (CD48<sup>+</sup> CD150<sup>+</sup>), and MPP3 (CD48<sup>+</sup> CD150<sup>-</sup>). cKit+Sca1<sup>-</sup> cells were identified as CMP/GMP. CD105<sup>+</sup>CD271<sup>+</sup> cells were further characterized as MSCs (CD90.2<sup>+</sup>). **(b)** BM cells were differentiated into dendritic cells or macrophages using GM-CSF or L929, respectively. For both subsets, a cell gate was selected in a SSC-A versus FSC-A plot, followed by gating on singlets in a FSC-H versus FSC-A plot and a live (DAPI<sup>-</sup>) selection as in (a). CD45<sup>+</sup> cells were further characterized as macrophages (CD11b<sup>+</sup> F4/80<sup>+</sup>), and CD11c<sup>+</sup> cells as dendritic cells (CD11b<sup>-</sup> F4/80<sup>-</sup> MHC-II<sup>hi</sup>). **(c)** Human BM aspirate was treated twice with erythrocyte lysis buffer, a SSC low cell gate was selected in a SSC-A versus FSC-A plot, followed by gating on singlets in a FSC-H versus FSC-A plot. Live (DAPI<sup>-</sup>) cells were further characterized as HSCs (CD45<sup>lo</sup> CD34<sup>+</sup>) and CD45<sup>hi</sup> cells (CD45<sup>hi</sup> CD34<sup>-</sup>). Clipart was obtained from Servier Medical Art (<https://smart.servier.com>) and Biorender.com.

**Supplementary Table 1. Cell markers to differentiate mouse BM cells by flow cytometry using MACSQuant® Analyzer 10.** Abbreviations: long-term (LT) and short-term (ST) hematopoietic stem cell (HSC), multipotent progenitor (MPP), common myeloid progenitor (CMP), granulocyte monocyte progenitor (GMP).

| <b>Cell surface marker</b>                                     | <b>Fluorophore</b> | <b>Clone N°</b> | <b>Manufacturer</b> | <b>Dilution</b> |
|----------------------------------------------------------------|--------------------|-----------------|---------------------|-----------------|
| <b><i>LT-HSC, ST-HSC, MPP2, MPP3, CMP, GMP</i></b>             |                    |                 |                     |                 |
| cKit                                                           | PE-Vio770          | REA791          | Miltenyi Biotec     | 1:50            |
| CD150                                                          | APC                | REA299          | Miltenyi Biotec     | 1:11            |
| CD48                                                           | PerCP-Vio700       | HM48-1          | Miltenyi Biotec     | 1:100           |
| CD34                                                           | FITC               | REA383          | Miltenyi Biotec     | 1:50            |
| Ter119                                                         | VioBlue            | Ter-119         | Miltenyi Biotec     | 1:11            |
| Gr-1                                                           | VioBlue            | REA810          | Miltenyi Biotec     | 1:500           |
| CD11b                                                          | VioBlue            | REA592          | Miltenyi Biotec     | 1:500           |
| TCR-β                                                          | VioBlue            | REA318          | Miltenyi Biotec     | 1:100           |
| B220                                                           | VioBlue            | REA755          | Miltenyi Biotec     | 1:500           |
| CD335                                                          | VioBlue            | REA815          | Miltenyi Biotec     | 1:50            |
| Sca-1                                                          | APC-Cy7            | D7              | BD Biosciences      | 1:40            |
| <b><i>Monocytes, macrophages, neutrophils, eosinophils</i></b> |                    |                 |                     |                 |
| Ly6C                                                           | APC                | AL-21           | BD Biosciences      | 1:200           |
| Ly6G                                                           | APC-Vio770         | REA526          | Miltenyi Biotec     | 1:100           |
| CD11b                                                          | PerCP              | M1/70           | BioLegend®          | 1:400           |
| F4/80                                                          | PE-Cy7             | BM8             | BioLegend®          | 1:200           |
| CD45                                                           | VioGreen           | REA737          | Miltenyi Biotec     | 1:200           |
| <b><i>Mesenchymal stem cells</i></b>                           |                    |                 |                     |                 |
| CD105                                                          | PE-Vio770          | REA1058         | Miltenyi Biotec     | 1:50            |
| CD271                                                          | APC-Vio770         | REA648          | Miltenyi Biotec     | 1:11            |
| CD34                                                           | FITC               | REA383          | Miltenyi Biotec     | 1:50            |
| Ter119                                                         | VioBlue            | Ter-119         | Miltenyi Biotec     | 1:11            |
| Gr-1                                                           | VioBlue            | REA810          | Miltenyi Biotec     | 1:500           |
| CD11b                                                          | VioBlue            | REA592          | Miltenyi Biotec     | 1:500           |
| TCR-β                                                          | VioBlue            | REA318          | Miltenyi Biotec     | 1:100           |
| B220                                                           | VioBlue            | REA755          | Miltenyi Biotec     | 1:500           |
| CD335                                                          | VioBlue            | REA815          | Miltenyi Biotec     | 1:50            |
| <b><i>Dendritic cells</i></b>                                  |                    |                 |                     |                 |
| CD11b                                                          | PerCP              | M1/70           | BioLegend®          | 1:400           |
| F4/80                                                          | PE-Cy7             | BM8             | BioLegend®          | 1:200           |
| CD11c                                                          | APC-Cy7            | REA791          | Miltenyi Biotec     | 1:100           |
| MHC-II                                                         | APC                | M5/114.15.2     | Miltenyi Biotec     | 1:100           |
| <b><i>Human HSC and CD45<sup>hi</sup> cells</i></b>            |                    |                 |                     |                 |
| CD45                                                           | FITC               | REA747          | Miltenyi Biotec     | 1:140           |
| CD34                                                           | APC                | 581             | BioLegend®          | 1:20            |

**Supplementary Table 2. Cell markers to differentiate BM cells by flow cytometry using FACSMelody™.**  
 Abbreviations: long-term (LT) and short-term (ST) hematopoietic stem cell (HSC), multipotent progenitor (MPP), common myeloid progenitor (CMP), granulocyte monocyte progenitor (GMP).

| <b>Cell surface marker</b>                               | <b>Fluorophore</b> | <b>Clone N°</b> | <b>Manufacturer</b> | <b>Dilution</b> |
|----------------------------------------------------------|--------------------|-----------------|---------------------|-----------------|
| <b><i>Mouse LT-HSC, ST-HSC, MPP2, MPP3, CMP, GMP</i></b> |                    |                 |                     |                 |
| cKit                                                     | PE-Vio770          | REA791          | Miltenyi Biotec     | 1:50            |
| CD150                                                    | PE-Cy5             | TC15-12F12.2    | BioLegend®          | 1:80            |
| CD48                                                     | PerCP-Vio700       | HM48-1          | Miltenyi Biotec     | 1:100           |
| CD34                                                     | FITC               | REA383          | Miltenyi Biotec     | 1:50            |
| Ter119                                                   | VioBlue            | Ter-119         | Miltenyi Biotec     | 1:11            |
| Gr-1                                                     | VioBlue            | REA810          | Miltenyi Biotec     | 1:500           |
| CD11b                                                    | VioBlue            | REA592          | Miltenyi Biotec     | 1:500           |
| TCR-β                                                    | VioBlue            | REA318          | Miltenyi Biotec     | 1:100           |
| B220                                                     | VioBlue            | REA755          | Miltenyi Biotec     | 1:500           |
| CD335                                                    | VioBlue            | REA815          | Miltenyi Biotec     | 1:50            |
| Sca-1                                                    | PE-CF594           | D7              | BD Bioscience       | 1:40            |
| <b><i>Human HSC, CD45<sup>hi</sup> cells</i></b>         |                    |                 |                     |                 |
| CD45                                                     | FITC               | REA747          | Miltenyi Biotec     | 1:140           |
| CD34                                                     | PE-Cy7             | 581             | BioLegend®          | 1:20            |

**Supplementary Table 3. Characteristic cell surface markers for the identification of mouse BM cells with flow cytometry.** Abbreviations: long-term (LT) and short-term (ST) hematopoietic stem cell (HSC), multipotent progenitor (MPP), common myeloid progenitor (CMP), granulocyte monocyte progenitor (GMP).

| <b>Cell Type</b>         | <b>Flow cytometry markers</b>                             |
|--------------------------|-----------------------------------------------------------|
| <b><i>Mouse</i></b>      |                                                           |
| MSC                      | Lin- CD105+ CD271+ CD90.2+                                |
| LT-HSC                   | Lin- Sca+ cKit+ CD150+ CD48-                              |
| ST-HSC                   | Lin- Sca+ cKit+ CD150- CD48-                              |
| MPP2                     | Lin- Sca+ cKit+ CD150+ CD48+                              |
| MPP3                     | Lin- Sca+ cKit+ CD150- CD48+                              |
| CMP / GMP                | Lin- Sca- cKit+ CD34+                                     |
| Monocytes                | CD45+ CD11b+ Ly6C <sup>Hi</sup> Ly6G- F4/80 <sup>Lo</sup> |
| Macrophages              | CD45+ CD11b+ Ly6C <sup>Lo</sup> Ly6G- F4/80+              |
| Neutrophils              | CD45+ CD11b+ Ly6C+ Ly6G+ F4/80-                           |
| Dendritic cells          | CD11c+ CD11b- F4/80- MHC-II <sup>Hi</sup>                 |
| <b><i>Human</i></b>      |                                                           |
| hHSPC                    | SSC <sup>Lo</sup> CD45 <sup>Lo</sup> CD34+                |
| CD45 <sup>hi</sup> cells | CD45 <sup>hi</sup> CD34-                                  |

**Supplementary Table 4.** Overview of the used primers.

| <b>Name</b> | <b>Sequence</b>       | <b>Tm (°C)*</b> |
|-------------|-----------------------|-----------------|
| Eef2_F      | TGTCAGTCATCGCCCATGTG  | 57.6            |
| Eef2_R      | CATCCTTGCGAGTGTCAGTGA | 57.1            |
| SL-RNA_F    | AACTAACGCTATATAAGTAT  | 42.6            |
| SL-RNA_R    | CAATAAAGTACAGAAACTG   | 43.1            |

\*Melting temperatures of primers.
