# Supplementary material for: Long-term hematopoietic stem cells as a parasite niche during treatment failure in visceral leishmaniasis
Source: PubMed Central journal article supplement (PMC9233693; doi:10.1038/s42003-022-03591-7), 2022-06-25
Supplement: 42003_2022_3591_MOESM2_ESM.pdf [file 42003_2022_3591_MOESM2_ESM.pdf]

## Description of Additional Supplementary Files

**File name:** Supplementary Data 1

**Description:** List of compounds and their dose tested in Syrian golden hamsters. Percentage of recovery (%R), single injection dose (SID), twice daily injection dose (BID).

**File name:** Supplementary Data 2

**Description:** Differential LT-HSC genes and systems biology analyses to evaluate enrichment of hallmark gene sets, pathways, transcription factor motifs, cell type enrichment and cross-pathology overlap.

**File name:** Supplementary Data 3

**Description:** The source data of Figures 1-6 and Supplementary Figures 1-6.
